# Supplementary material for: CRISPR-Cas– induced IRF3 and MAVS knockouts in a salmonid cell line disrupt PRR signaling and affect viral replication
Source: PubMed Central journal article supplement (PMC10425769; doi:10.3389/fimmu.2023.1214912), 2023-07-17
Supplement: DataSheet_2.pdf [file DataSheet_2.pdf]

### Supplementary material – Duplicate genes

The genes for IRF3, IRF7, and MAVS from rainbow trout and Atlantic salmon were aligned per gene, and sequencing primers were designed in homologous regions. These primers enabled sequencing of the respective genes from the chinook salmon genome as isolated from CHSE-214 cells, and a blast against the chinook salmon genome in ncbi confirmed the genetic locations and sequences.

**Table: Locations and predictions of genomic locations**

| Gene | Sequence                                                                                                | Location            | Annotation ncbi                   | Sequence ID |
|------|---------------------------------------------------------------------------------------------------------|---------------------|-----------------------------------|-------------|
| IRF3 | Oncorhynchus tshawytscha isolate Ot180627B linkage group LG24, Otsh_v2.0, whole genome shotgun sequence | 5299671 - 5302798   | Predicted IRF3                    | NC_056452.1 |
| IRF7 | Oncorhynchus tshawytscha isolate Ot180627B linkage group LG06, Otsh_v2.0                                | 36074493 - 36084407 | Predicted IRF7-like               | NC_056434.1 |
| MAVS | Oncorhynchus tshawytscha isolate Ot180627B linkage group LG11, Otsh_v2.0                                | 55045023 - 55053498 | Predicted Proline-rich protein 36 | NC_056439.1 |

We identified possible duplicate genes by a blast of the coding sequences in the ncbi nucleotide collection. IRF3 only showed homology with IRF3 transcript variants. IRF7 had 80% homology with a predicted mRNA for IRF8, along with being identical to predicted IRF7 mRNA. The IRF8 mRNA was aligned in Clustal omega with IRF7 and IRF8 from *Homo sapiens*, *Danio rerio*, and *Oncorhynchus mykiss* and clustered with IRF8, so is probably the IRF8 mRNA and not a IRF7 duplicate.

**Figure: Phylogenetic tree of IRF7 and IRF8 coding sequences**

## Phylogenetic Tree

*This is a Neighbour-joining tree without distance corrections.*

Branch length:  Cladogram  Real

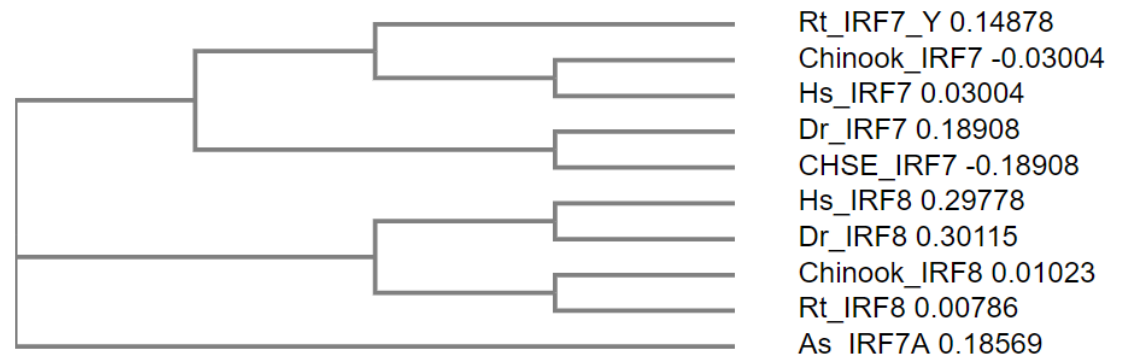

MAVS corresponded to a predicted proline-rich protein 36 mRNA and had 66% homology with the predicted MAVS mRNA. The gene we found while searching for MAVS was also predicted to be PRP36, so we set out to check these predictions. An alignment with the CDSs of *Homo sapiens*, *Mus musculus*, *Danio rerio*, and *Oncorhynchus mykiss* MAVS and PRP36 showed grouping of both mRNAs with MAVS, with the predicted PRP36 mRNA being closest to the other salmonid MAVS sequences.

## Phylogenetic Tree

*This is a Neighbour-joining tree without distance corrections.*

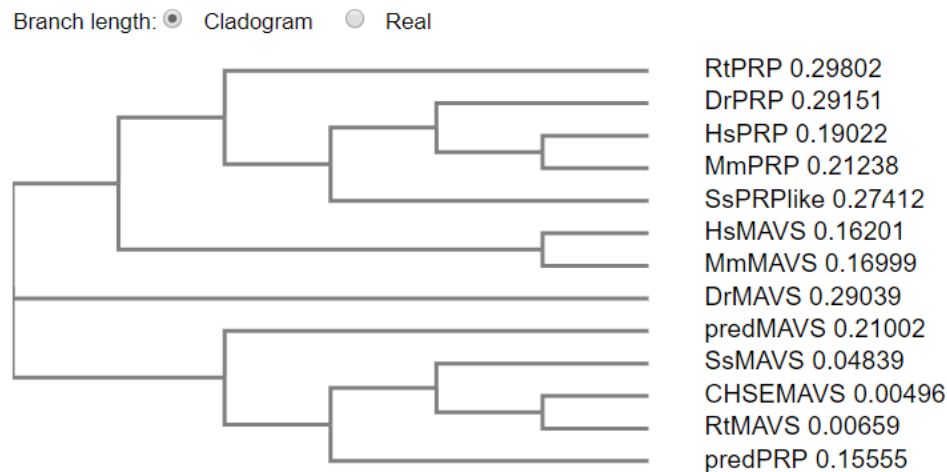

**Figure: Phylogenetic tree of MAVS and PRP36 coding sequences**

The predicted PRP36 in chinook salmon thus seems to be actually MAVS and will now be called ChMAVSA, while the mRNA predicted to be MAVS could be a duplicate gene and will be called ChMAVSB. These conclusions are corroborated by domain predictions. ChMAVSA has a very clear CARD domain, while in ChMAVSB only the death domain superfamily was recognized. Both proteins have a transmembrane domain at the C terminus.

We blasted both mRNA sequences against the chinook salmon, rainbow trout, and Atlantic salmon ncbi RefSeq Genome Databases to find the corresponding genes and to investigate the gene synteny.

**Table: Genomic locations of genes corresponding to ChMAVSA and ChMAVSB**

| <b>Name used here</b> | <b>Species</b>  | <b>Predicted in ncbi</b>                                                        | <b>Location</b> | <b>Accession no. ncbi</b> |
|-----------------------|-----------------|---------------------------------------------------------------------------------|-----------------|---------------------------|
| <b>ChMAVSA</b>        |                 |                                                                                 |                 | XM_042330395              |
| ChMAVSA               | Chinook salmon  | proline-rich protein 36                                                         | LG11 - end      | LOC112236223              |
| RtMAVSA               | Rainbow trout   | MAVS                                                                            | Chr. 19 - end   | 100499614 (mavs)          |
| AsIPS-1               | Atlantic salmon | IPS-1 (MAVS)                                                                    | Chr. 01 - start | LOC100316613              |
| <b>ChMAVSB</b>        |                 |                                                                                 |                 | XM_042326218              |
| ChMAVSB               | Chinook salmon  | MAVS                                                                            | LG08 - start    | 112237596 (mavs)          |
| RtMAVSB               | Rainbow trout   | mRNA-nascent polypeptide-associated complex subunit alpha, muscle-specific form | Chr. 25 - end   | LOC110504282              |
| AsMAVSB               | Atlantic salmon | MAVS-like / mucin-6-like                                                        | Chr. 9 - 1/3    | LOC106611470              |

Synteny for ChMAVSa compares very well between all three species, indicating that ChMAVSa is actually MAVS as described for Atlantic salmon (Lauksund 2009, Biacchesi 2009). The synteny of ChMAVSb compares well with the RtMAVSb gene (predicted nascent polypeptide-associated complex subunit alpha, muscle-specific form), and to a lesser extent to the AsMAVSb gene (predicted MAVS-like or mucin-6-like). Interestingly, AsMAVSb is predicted to be MAVS-like, has two genes in the vicinity that are near the actual ChMAVSa, and is on a location of chromosome 9 that was duplicated from the start of chromosome 1, where the AsIPS-1 (MAVS) gene is situated. This all suggests that this gene might be a duplicate of MAVS. The ChMAVSb and AsMAVSb proteins both contain a death domain superfamily domain that indicates a possible CARD domain at the N terminus and a transmembrane domain at the C terminus, suggesting a function similar to MAVS. The RtMAVSb protein lacks these domains, however, and will not have a MAVS-like function.

|        |       |           |                    |                |         |         |                 |         |        |        |       |       |        |       |       |        |      |            |         |               |
|--------|-------|-----------|--------------------|----------------|---------|---------|-----------------|---------|--------|--------|-------|-------|--------|-------|-------|--------|------|------------|---------|---------------|
| sav1   | at11  | cdkl1     | l2hgdh             | sos2           | cn1h1   | pac2    | dcaf5           | map3k9  | pcnx1  | fbln5  | plek2 | smor1 | paplna | exd2  | wdr32 | manba  | nat8 | si:dky-33c | ChMAVSa | rab11fip5:cfd |
| >      | <     | >         | >                  | >              | <       | >       | >               | >       | >      | >      | >     | <     | <      | <     | >     | >      | >    | <          | <       | >             |
| jade1  | cfd   | rab11fip5 | RtMAVSa            | si:dky-33c12.3 | nat8    | manba   | wdr32           | paplna  | smor1  | plek2  | pcnx1 | med6  | map3k9 | cn1h1 | sos2  | l2hgdh | at11 | sav1       |         |               |
| >      | >     | <         | <                  | <              | >       | >       | >               | <       | <      | >      | <     | >     | <      | <     | >     | >      | <    | >          |         |               |
| jade1  | manba | AsIPS-1   | exd2               | smor1          | pcnx    | fbln5   | plek2           | med6    | map3k9 | sav1   | at11  | cdkl1 | l2hgdh | sos2  | cn1h1 |        |      |            |         |               |
| >      | >     | >         | >                  | >              | >       | >       | >               | >       | <      | >      | <     | >     | >      | >     | <     |        |      |            |         |               |
| asmt2  | letm1 | fgfr3     | EIF2AK3            | ChMAVSb        | pank2   | slc39a8 | zmp:0000(marc1) | capn3a  | uti1b  | golga5 |       |       |        |       |       |        |      |            |         |               |
| <      | >     | <         | >                  | >              | >       | <       | <               | <       | <      | <      |       |       |        |       |       |        |      |            |         |               |
| capn3a | nenf  | marc1     | zmp:00000(slc39a8) | mrps26         | pank2   | RtMAVSb | ap5s1           | EIF2AK3 | fgfr3  | letm1  | asmt2 |       |        |       |       |        |      |            |         |               |
| >      | >     | >         | >                  | >              | <       | <       | >               | <       | >      | <      | >     |       |        |       |       |        |      |            |         |               |
| nenf   | ap5s1 | EIF2AK3   | pac2               | mrps26         | AsMAVSb | golga5  | dcaf5           | uti1b   |        |        |       |       |        |       |       |        |      |            |         |               |
| >      | <     | >         | >                  | >              | <       | >       | <               | <       |        |        |       |       |        |       |       |        |      |            |         |               |

**Figure: Synteny of chinook salmon, rainbow trout, and Atlantic salmon genes corresponding to ChMAVSa and ChMAVSb**

|                                                                          |
|--------------------------------------------------------------------------|
| MAVS gene/duplicate                                                      |
| Strong synteny in the three species                                      |
| Synteny in chinook salmon and rainbow trout                              |
| Synteny in Atlantic salmon and rainbow trout                             |
| Synteny in Atlantic salmon and chinook salmon                            |
| Present near Atlantic salmon MAVS duplicate and chinook salmon MAVS gene |
| Genes with largely conserved gene order                                  |

**Legend**
